# Supplementary material
Source: Research Square preprint supplement (doi:10.21203/rs.3.rs-9985723/v1)
Supplement: Supplementary file 1 [file 71207c1249c1ca5d3c032d35.docx]

Supplementary Materials for

Structurally complex Al-Si eutectic structure to resist hydrogen embrittlement in 3D-printed Al alloy

Supplementary Table 1 Engineering the mechanical properties of AlSi10Mg.

|  | Uncharged AlSi10Mg | Charged AlSi10Mg |
| --- | --- | --- |
| Yield strength (MPa) | 264.46±1.93 | 241.19±2.57 |
| UTS (MPa) | 440.45±2.56 | 410.09±4.93 |
| Elongation (%) | 12.52±0.08 | 11.19±0.24 |


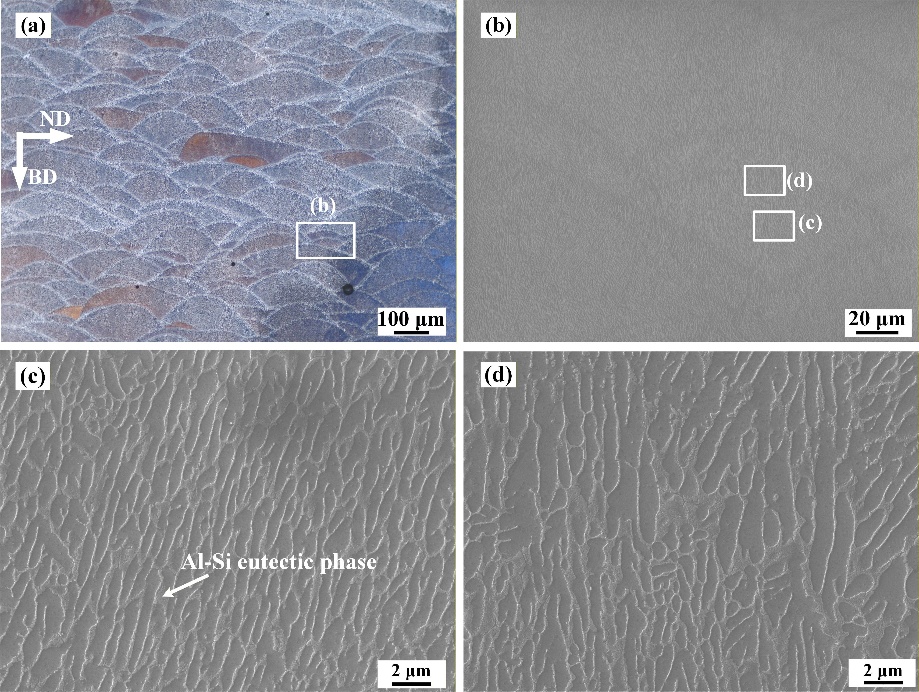


**Supplementary Fig. 1** **Microscopy image of AlSi10Mg.** (a) Optical microscopy image, selective electron microscopy (SEM) image in (b) Overall morphology, (c) inner the molten pool, (d) molten pool boundary area. The average dendrite space is 0.73 μm, while 1.18 μm in the molten pool boundary area.


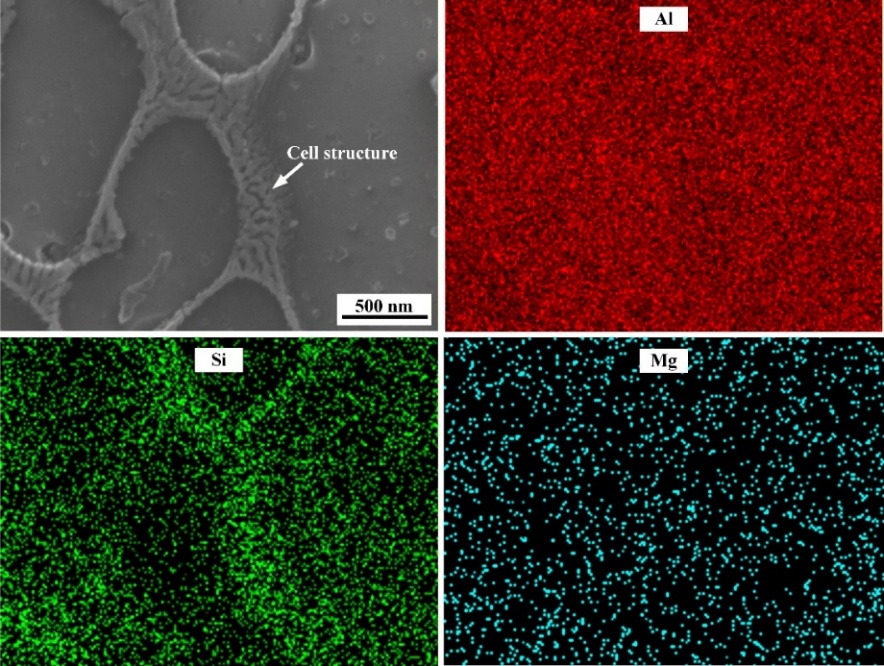


**Supplementary Fig. 2 Energy-dispersive X-ray spectroscopy (EDS) mapping of the cell structure in AlSi10Mg.**

Supplementary Note 1: Microstructure and strengthening mechanisms in 3D-printed AlSi10Mg


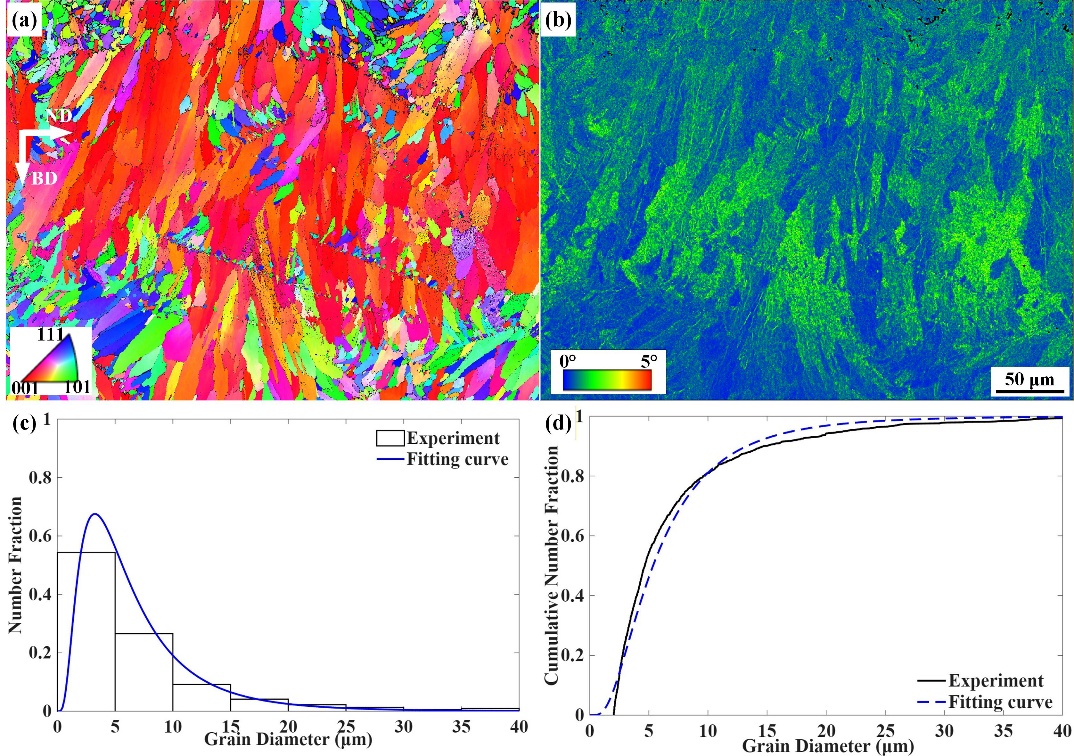


Supplementary Fig. 3 EBSD result of the AlSi10Mg sample. (a) BD (//<001>) inverse pole figure, (b) Kernel average misorientation, (c) log-normal grain size distribution, (d) cumulated grain size distribution.

Supplementary Table 2 Data extracted from the Supplementary Fig. 3.

| Average grain size (μm) | 7.196 |
| --- | --- |
| Average KAM value (°) | 0.7699 |
| Grain size distribution, μ (μm) | 1.6784 |
| Grain size distribution, σ (μm) | 0.7082 |

In LPBF AlSi10Mg, the strengthening mechanisms to yield strength include the grain boundary strengthening (), Al-Si cell structure strengthening (), solid solution strengthening (), and dislocation strengthening (), as shown in Supplementary Fig. 4. It should be noted that the contributions of the different strengthening mechanisms should not be linearly superimposed, a coupling strength of 78.1 MPa is identified, arising from their synergistic interactions. The calculation processes are shown as follows:

As revealed by previous studies 1, the Al-Si cell structure played a similar role as grain boundaries in strengthening, the and can be calculated by the Hall-Patch formula:

Where is ∼0.04 MPa∗m1/2 for Al-matrix grains 2, and ∼0.05 MPa∗m1/2 for Al-Si eutectic cell structure 3. is the diameter of grains or the Al-Si cell structure. The average diameter of cell structure is 0.73 μm According to the calculation result, the is 14.9 MPa, while is 58.5 MPa. Therefore, the cell structure contributed more to the yield strength than the grain boundary in LPBF-fabricated AlSi10Mg.

As expressed by Yang et al.4, the can be calculated as5:

Where is the concentration of the element, is constant depending on element category, which is 17 and 11 MPa wt%−1 for Mg and Si, respectively. The energy-dispersive X-ray spectroscopy (EDX) result shows that the Mg and Si concentrations are 4.51 wt.% in the Al matrix, and they are undetectable for the Mg. Therefore, the is 49.6 MPa.

The for AlSi10Mg can be expressed as 6:

Where M (3.06) is the Taylor factor, is material constant as 0.16, G is the shear module as 26.5 GPa, b is the Burgers factor as 0.286 nm, d is the step size for EBSD image. is the average KAM value extracted from **Supplementary Table 2**. In this study, the is 63.4 MPa.


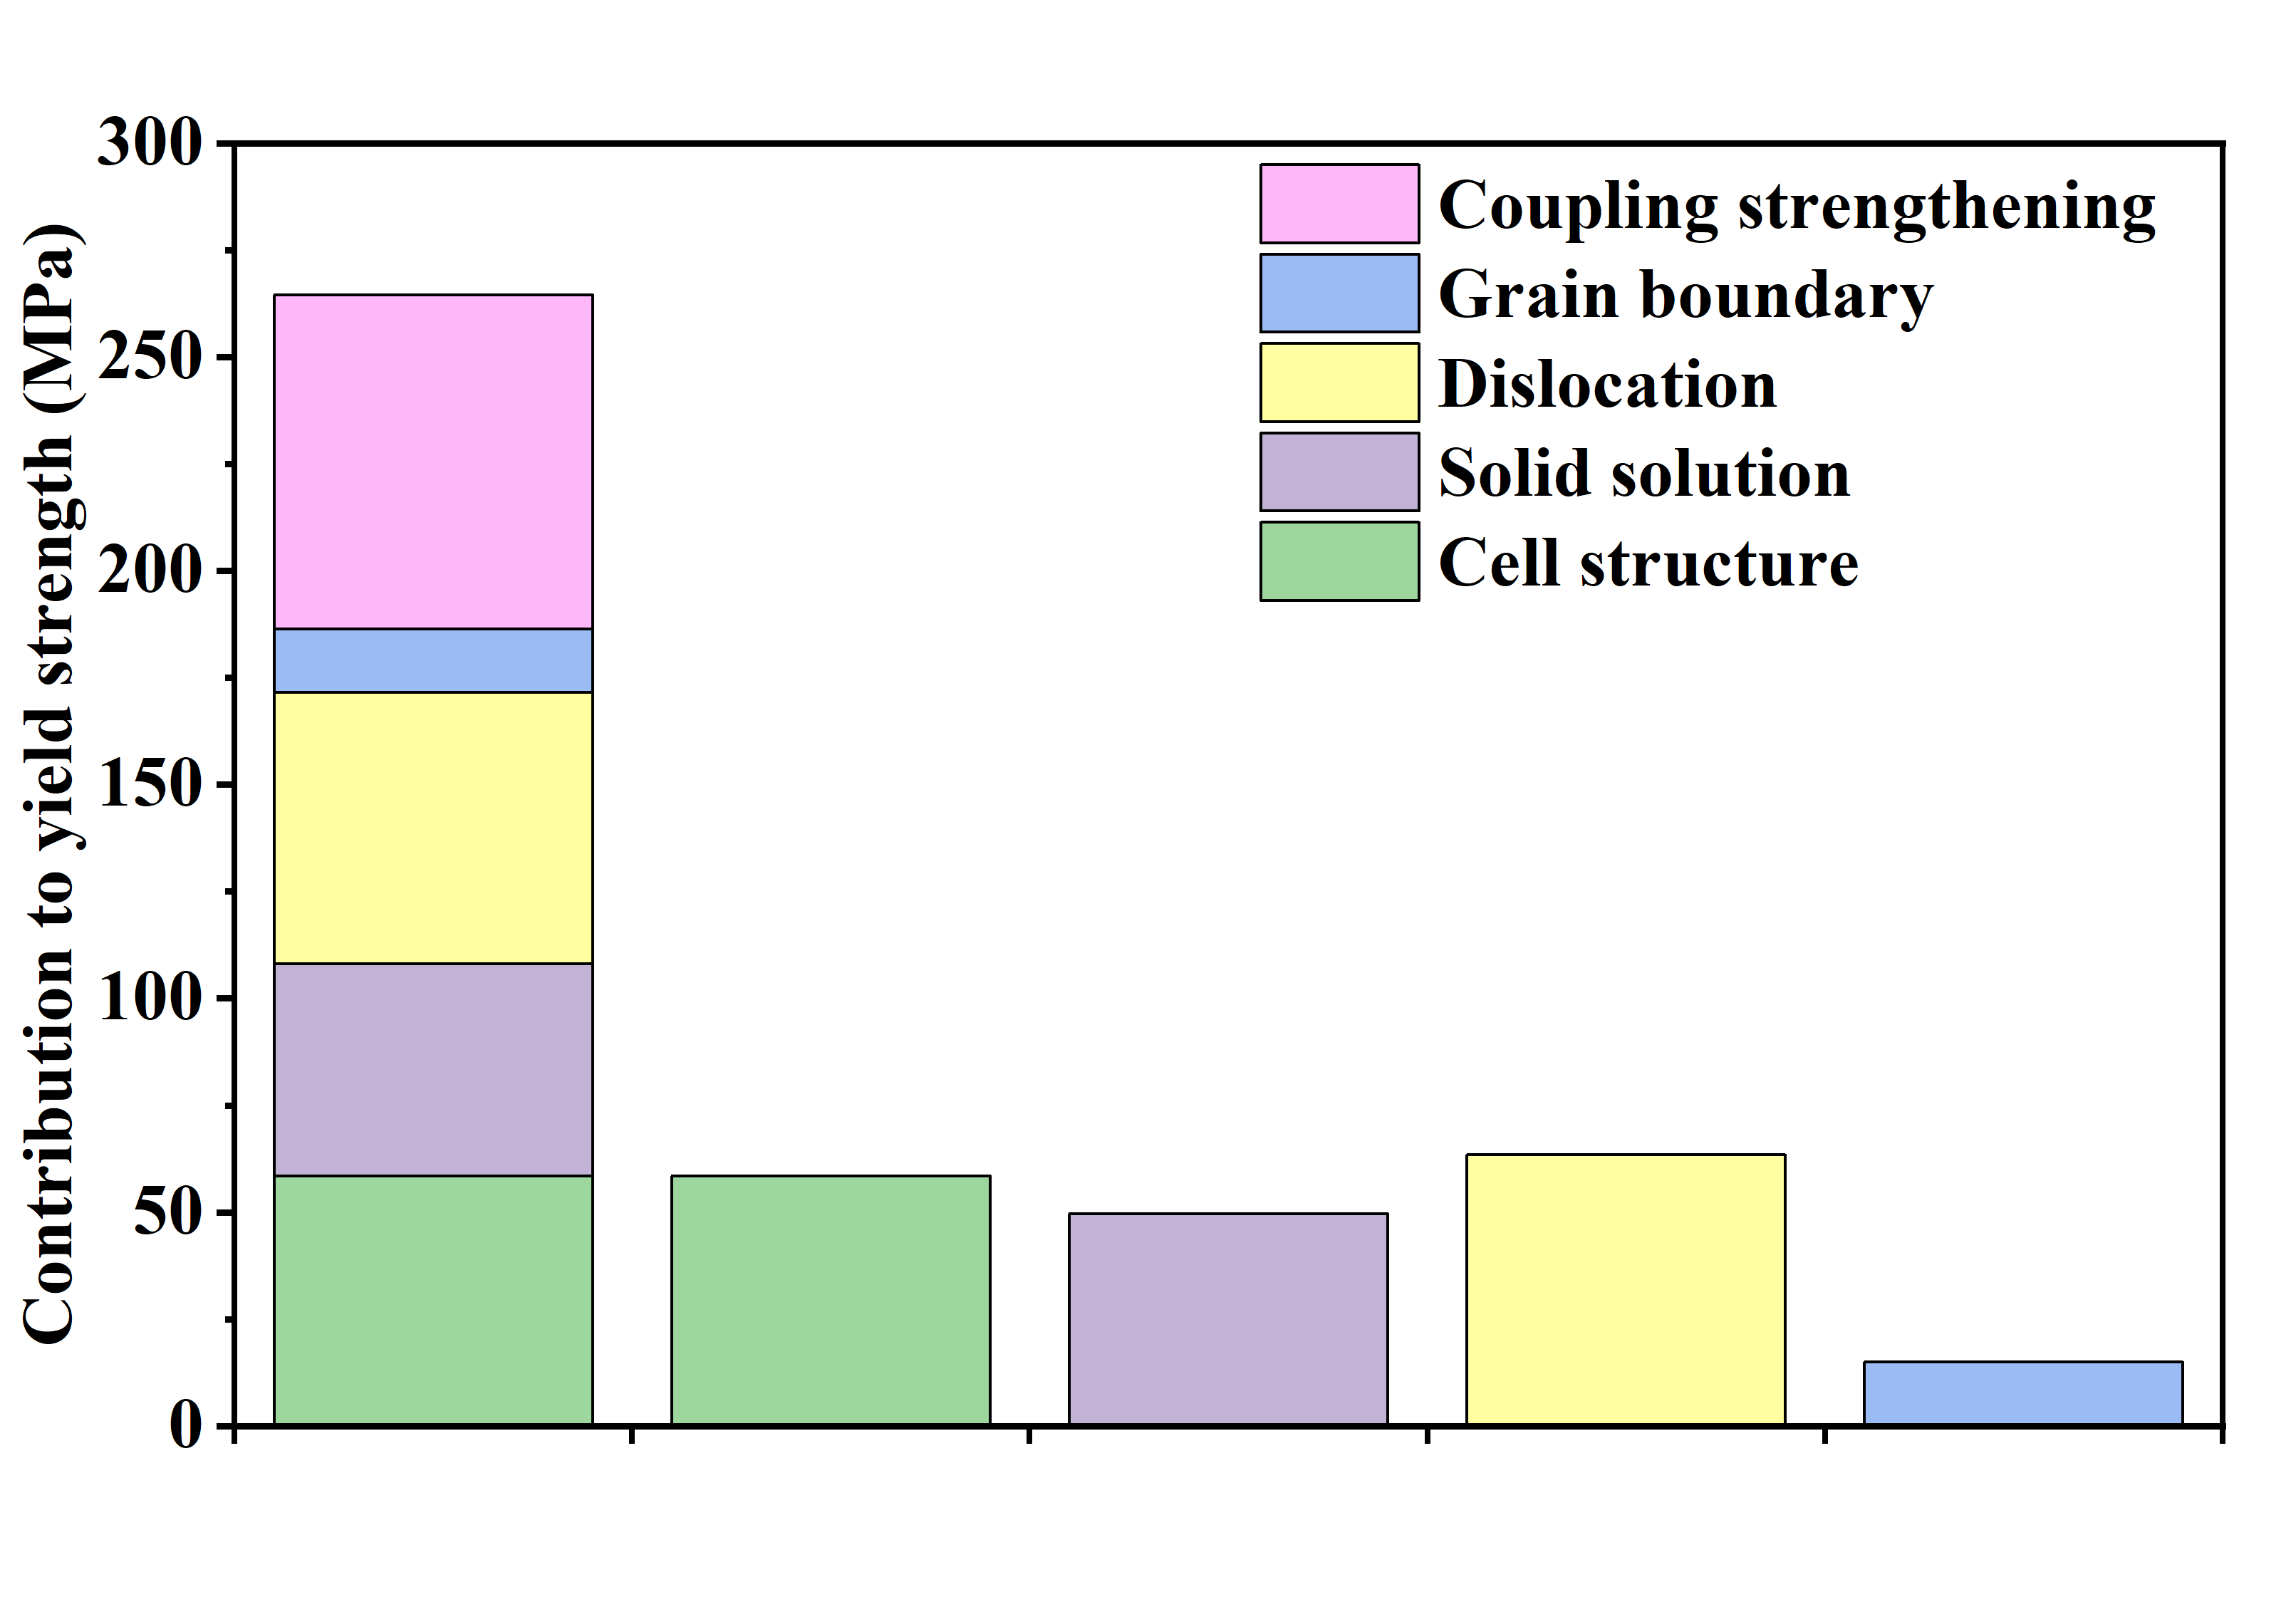


Supplementary Fig. 4 Contribution to the yield strength for different mechanisms.


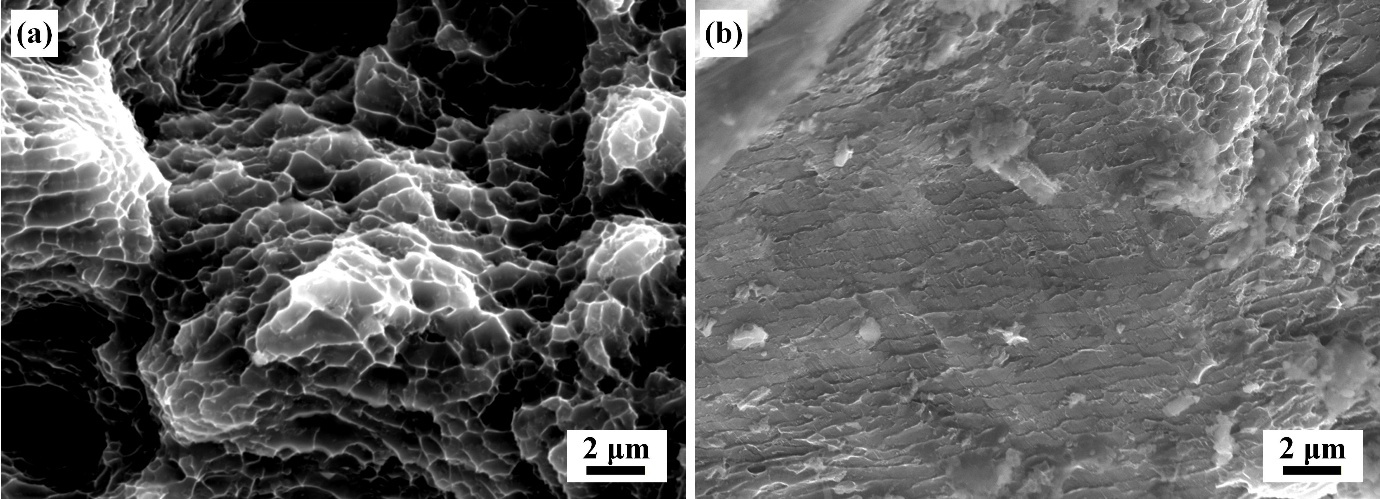


**Supplementary Fig. 5 Enlarged view of Fig. 1**

Supplementary Note 2: Analysis of thermal desorption spectrum (TDS) results

Supplementary Table 3 Peak temperature of TDS curves.

|  | Peak temperature (K) | | |
| --- | --- | --- | --- |
| 15 K/s | 22 K/s | 28K/s |
| Peak 1 | 503.8 | 530.0 | 537.9 |
| Peak 2 | 567.8 | 609.5 | 636.3 |
| Peak 3 | 737.6 | 756.3 | 770.9 |

The activation energy of trap sites can be calculated using the Kissinger method 7:

where is the heating rate, is the peak temperature (in Kelvin) of the trap site with different heating rates, is the pre-exponential factor, is the universal gas constant, 8.314J/(mol*K). By plotting the vs ), the slope () can be obtained by linear fitting. Finally, the activation energy can be determined:

Supplementary Fig. 5 Kissinger plots and trap energy for the TDS results extracted from Fig.1.

Supplementary Table 4 Data used for comparison in Fig. 1e.

| Materials | H content (wppm) | HEI (%) | | Reference |
| --- | --- | --- | --- | --- |
| Al-Mg–Sc-I | 7.0 | 45.3 | Jiang et al. 8 | |
| Al–Mg–Sc-II | 7.0 | 9.0 |
| 7XXX Al alloy | 2.5 | 24.4 | Hou et al. 9 | |
| Rolling Al-4.2Mg-0.75 Mn | 1.838 | 35.9 | Safyari et al.10 | |
| WAAM Al-4.2Mg-0.75 Mn | 4.3 | 2.2 |
| Cr-added 7xxx alloy | 1.45 | 36.68 | Safyari et al.11 | |
| Al-Cu-Mg alloy | 3.37 | 21.1 | Safyari et al. 12 | |
| AA 2024 Al alloy | 11 | 50.7 | Larigno et al. 13 | |


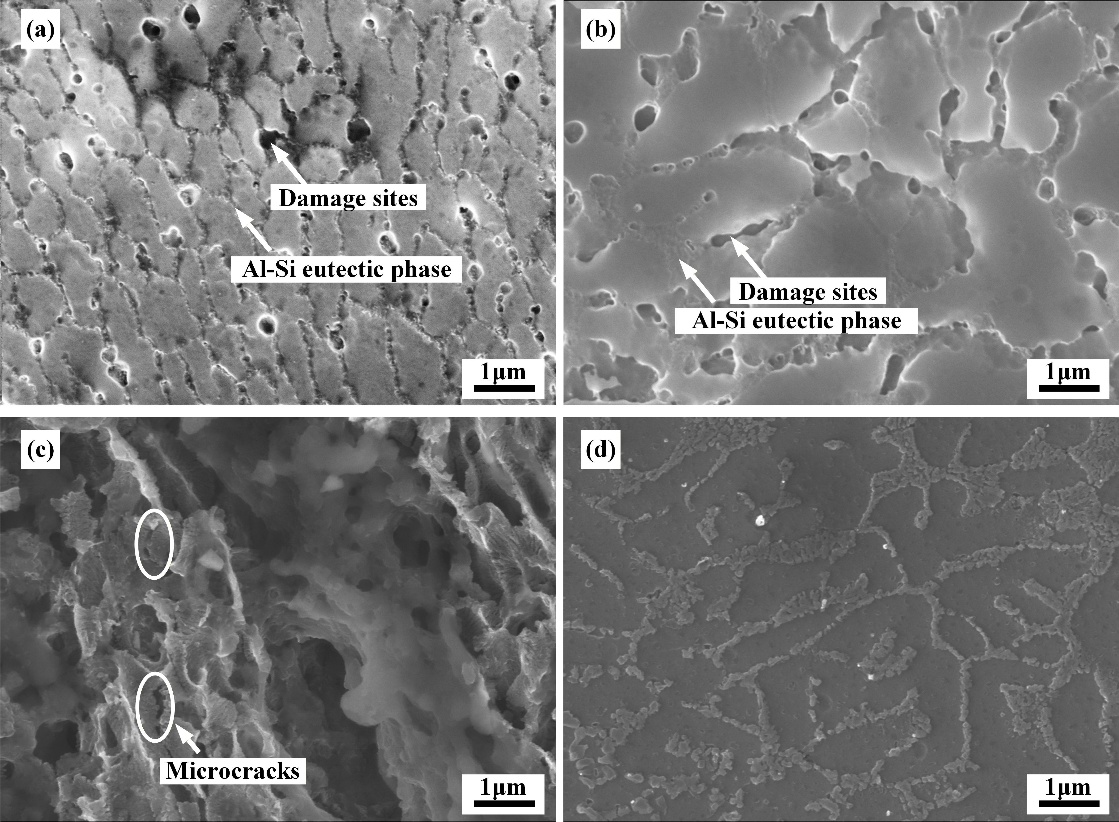


Supplementary Fig. 7 Enlarged view of Fig. 2. (a) Fig. 2c, (b) Fig. 2f, (a) Fig. 2i, (a) Fig. 2l.


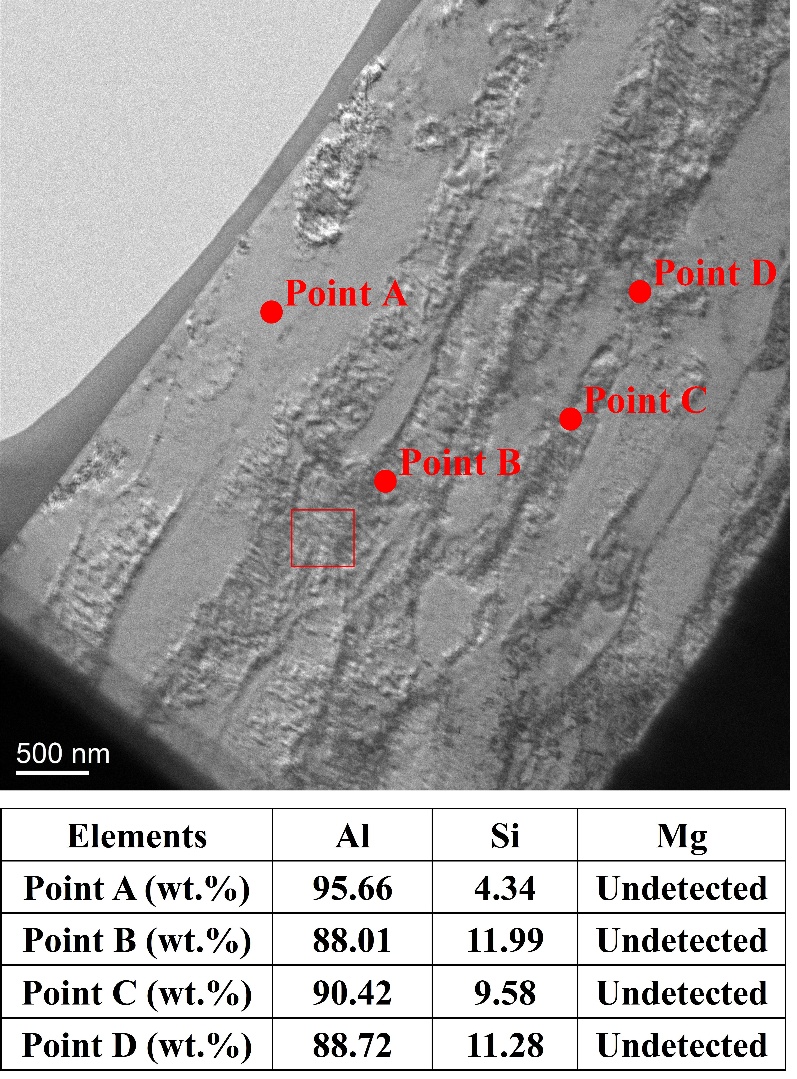


Supplementary Fig. 8 Point EDX result in TEM testing.

**Supplementary Note 3: Details of Density functional theory (DFT) model**

Density functional theory (DFT) calculations were performed using the Vienna Ab initio Simulation Package (VASP) based on the projector augmented-wave (PAW) method 14, 15, 16. The exchange-correlation interactions were described using the generalized gradient approximation (GGA) within the Perdew-Burke-Ernzerhof (PBE) functional 17. A plane-wave cutoff energy of 450 eV was employed for all calculations. Subsequent structural optimizations were carried out using the conjugate gradient algorithm until the total energy and atomic force convergence criteria reached 10-5 eV and 0.02 eV/Å, respectively. For the melt-quench ab initio molecular dynamics (AIMD) simulations 18, 19, electronic self-consistent calculations were performed using the Fast minimization scheme together with a Methfessel-Paxton smearing width of 0.2 eV 20. Subsequent structural relaxations and hydrogen trapping optimizations were carried out using the Normal electronic minimization algorithm with a smearing width of 0.1 eV. Real-space projection operators were treated automatically to improve computational efficiency for the large amorphous supercell calculations. Symmetry constraints were disabled during amorphization and hydrogen trapping calculations to correctly describe the disordered atomic configurations. Due to the large size of the amorphous supercell, Brillouin zone sampling was performed using Γ-point-only sampling. Convergence tests confirmed that the calculated total energies were converged within approximately 0.01 eV.

The initial crystalline Al supercell was generated using the Atomsk package 21 from a face-centered cubic (FCC) Al unit cell with a lattice parameter of 4.041 Å using a 3×3×3 supercell expansion, resulting in a total of 108 atoms. To construct the Al88​Si12​​ alloy model, 13 Al atoms were randomly substituted by Si atoms, producing a composition consisting of 95 Al atoms and 13 Si atoms. The amorphous Al88​Si12​​ structure was generated using AIMD through a melt-quench procedure within the canonical (NVT) ensemble using the Nosé-Hoover thermostat 22, 23. The alloy structure was initially heated to 1600 K to eliminate long-range crystalline order and subsequently cooled from 1600 K to 300 K through a stepwise melt-quench procedure with temperature decrements of 200 K. At each temperature stage, equilibration calculations were performed to ensure structural stabilization before proceeding to the next cooling step. Ionic motion was propagated using a time step of 1 fs under fixed-volume conditions. After quenching to 300 K, the optimized configuration exhibited characteristic amorphous behavior with homogeneous Si distribution throughout the Al matrix.

The trapping energy of hydrogen (Etrap) was calculated by placing one hydrogen atom at each site in the Al88​Si12 supercell followed by full structural optimization. The relaxed geometries were subsequently analyzed to determine energetically favorable trapping environments and local structural distortions induced by hydrogen incorporation. Atomic configurations were visualized using VESTA 3.5.8.

**Supplementary Table 4 Calculated hydrogen trapping energies for thirteen independent insertion sites in amorphous Al88Si12.**

| Sites | Local Environment | Trapping Energy (eV) |
| --- | --- | --- |
| S1 | Small free-volume | -0.27 |
| S2 | Al-rich region | -0.304 |
| S3 | Small Al-Si mixed | -0.313 |
| S4 | Medium free-volume | -0.351 |
| S5 | Si-neighboring region | -0.298 |
| S6 | Al-rich cavity | -0.379 |
| S7 | Medium free-volume | -0.422 |
| S8 | Al-Si mixed environment | -0.453 |
| S9 | Large free-volume | -0.55 |
| S10 | Large Al-rich | -0.582 |
| S11 | Large free-volume | -0.55 |
| S12 | Large Al-Si | -0.572 |
| S13 | Largest free-volume | -0.64 |


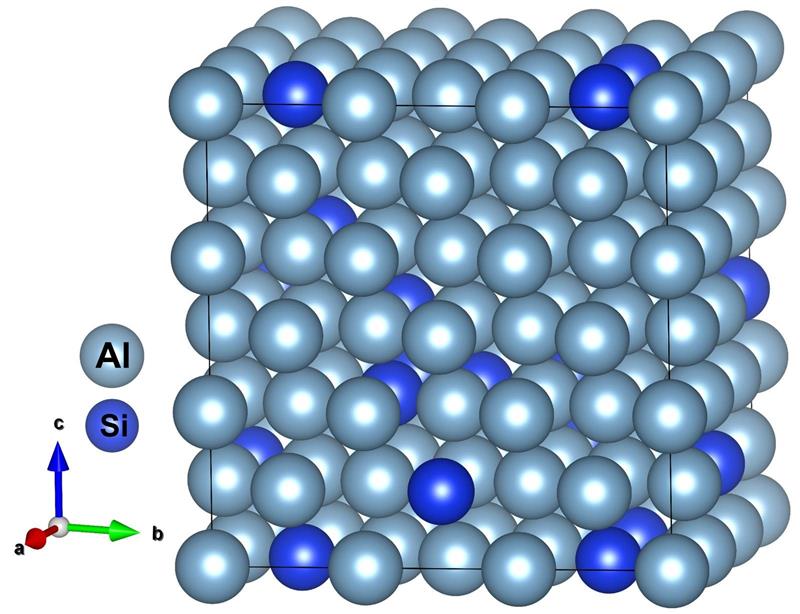


**Supplementary Fig. 9 Atomic structures of (a) the crystalline FCC-derived Al88Si12 model prior to AIMD melt-quench simulations.**


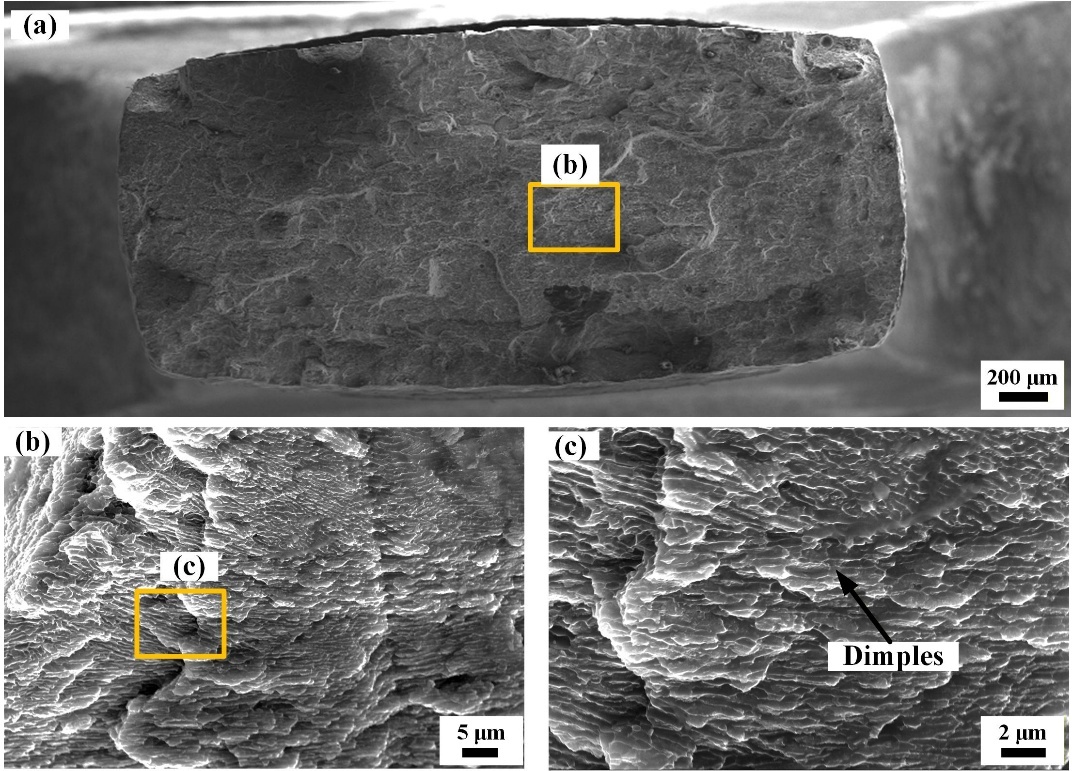


Supplementary Fig. 10 Fractography of hydrogen-charged AlSi10Mg in the middle area with less hydrogen ingress.


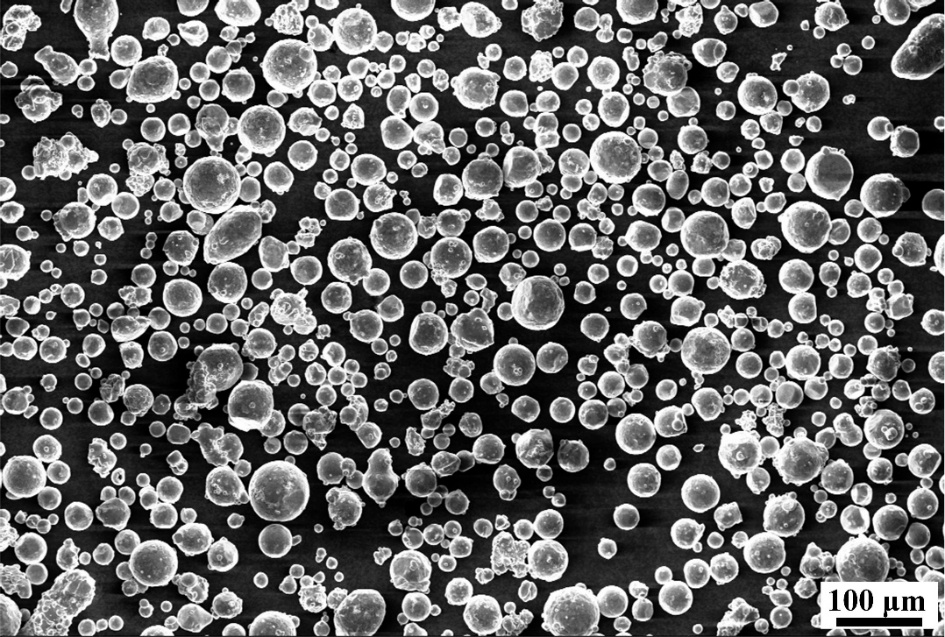


**Supplementary Fig. 11 Morphology of AlSi10Mg powder for 3D-printing.**


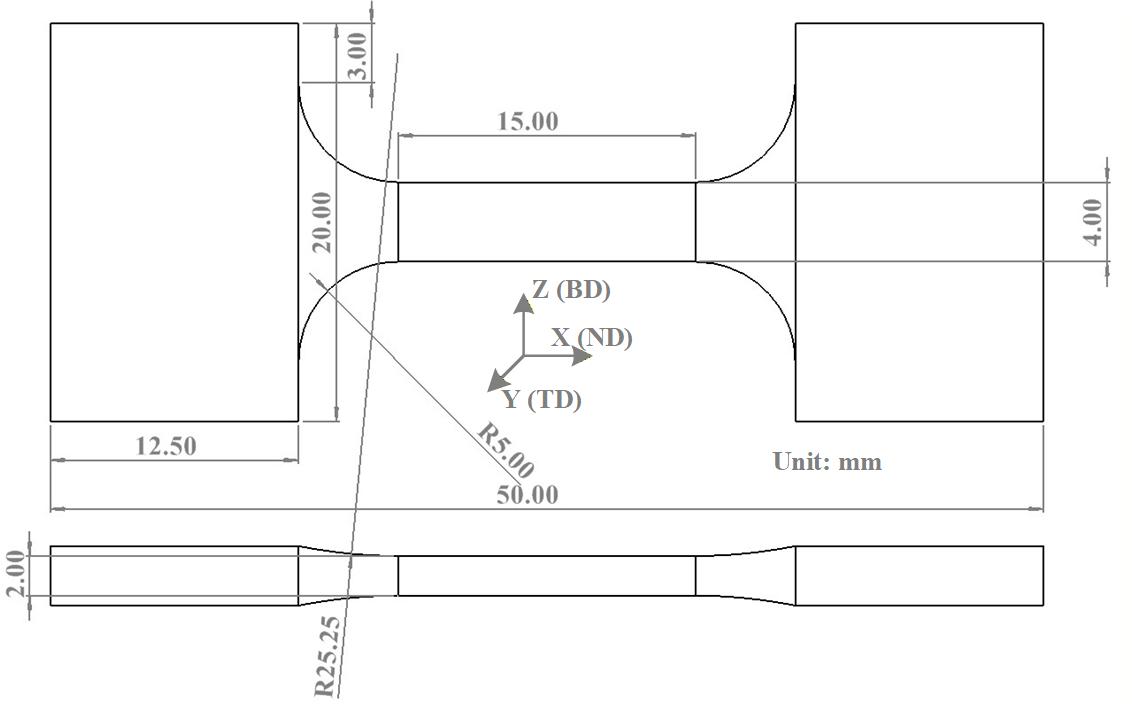


Supplementary Fig. 12 Morphology of tensile test coupons for SSRT. BD-Building direction. (a) Front view with coordination, (b) Top view.BD-Building direction, ND-Normal direction, TD-thickness direction.

**References**

1. Okulov IV*, et al.* Microstructure and mechanical properties of new composite structured Ti-V-Al-Cu-Ni alloys for spring applications. *Mater Sci Eng A* **603**, 76–83 (2014).

2. Snopiński P, Woźniak A, Pagáč M. Microstructural evolution, hardness, and strengthening mechanisms in SLM AlSi10Mg Alloy subjected to equal-channel angular pressing (ECAP). *Materials* **14**, (2021).

3. Fite J, Eswarappa Prameela S, Slotwinski J, Weihs TP. Enhanced mechanical properties by eutectic cells in AlSi10Mg - A promising paradigm for strengthening aluminum in additive manufacturing. *Mater Charact* **204**, (2023).

4. Yang KV, Rometsch P, Davies CHJ, Huang A, Wu X. Effect of heat treatment on the microstructure and anisotropy in mechanical properties of A357 alloy produced by selective laser melting. *Mater Des* **154**, 275–290 (2018).

5. Ghio E, Cerri E. Additive Manufacturing of AlSi10Mg and Ti6Al4V Lightweight Alloys via Laser Powder Bed Fusion: A Review of Heat Treatments Effects. *Materials (Basel)* **15**, (2022).

6. Odnobokova M, Torganchuk V, Tikhonova M, Dolzhenko P, Kaibyshev R, Belyakov A. On the Strength of a 316L-Type Austenitic Stainless Steel Produced by Selective Laser Melting. *Metals* **13**, (2023).

7. Blaine RL, Kissinger HE. Homer Kissinger and the Kissinger equation. *Thermochim Acta* **540**, 1–6 (2012).

8. Jiang S*, et al.* Structurally complex phase engineering enables hydrogen-tolerant Al alloys. *Nature* **641**, 358–364 (2025).

9. Hou Y*, et al.* Effects of hydrogen charging on the corrosion behavior and hydrogen embrittlement of 7xxx Al Alloys: An integrated experimental and multiscale simulation study. *Corros Sci* **257**, (2025).

10. Safyari M*, et al.* Manipulating nanostructure during wire arc additive manufacturing defeats hydrogen embrittlement. *Corros Sci* **233**, (2024).

11. Safyari M, Moshtaghi M, Hojo T, Akiyama E. Mechanisms of hydrogen embrittlement in high-strength aluminum alloys containing coherent or incoherent dispersoids. *Corros Sci* **194**, 109895 (2022).

12. Safyari M, Moshtaghi M, Kuramoto S, Hojo T. Influence of microstructure-driven hydrogen distribution on environmental hydrogen embrittlement of an Al–Cu–Mg alloy. *Int J Hydrogen Energy* **46**, 37502–37508 (2021).

13. Larignon C, Alexis J, Andrieu E, Odemer G, Blanc C. The contribution of hydrogen to the corrosion of 2024 aluminium alloy exposed to thermal and environmental cycling in chloride media. *Corros Sci* **69**, 211–220 (2013).

14. Kresse G, Furthmüller J. Efficient iterative schemes for ab initio total-energy calculations using a plane-wave basis set. *PhRvB* **54**, 11169–11186 (1996).

15. Kresse G, Joubert D. From ultrasoft pseudopotentials to the projector augmented-wave method. *PhRvB* **59**, 1758–1775 (1999).

16. Blöchl PE. Projector augmented-wave method. *PhRvB* **50**, 17953–17979 (1994).

17. Perdew JP, Burke K, Ernzerhof M. Generalized Gradient Approximation Made Simple. *Physical Review Letters* **77**, 3865–3868 (1996).

18. Kresse G, Hafner J. Ab initio molecular dynamics for liquid metals. *PhRvB* **47**, 558–561 (1993).

19. Kresse G, Hafner J. Ab initio molecular-dynamics simulation of the liquid-metal--amorphous-semiconductor transition in germanium. *PhRvB* **49**, 14251–14269 (1994).

20. Methfessel M, Paxton AT. High-precision sampling for Brillouin-zone integration in metals. *PhRvB* **40**, 3616–3621 (1989).

21. Hirel P. Atomsk: A tool for manipulating and converting atomic data files. *Computer Physics Communications* **197**, 212–219 (2015).

22. Nosé S. A unified formulation of the constant temperature molecular dynamics methods. *The Journal of Chemical Physics* **81**, 511–519 (1984).

23. Hoover WG. Canonical dynamics: Equilibrium phase-space distributions. *Physical Review A* **31**, 1695–1697 (1985).
